# Supplementary material
Source: PubMed Central journal article supplement (PMC8172239)
Supplement: NIHMS1612305-supplement-Suppl__figures_and_text.pdf [file NIHMS1612305-supplement-Suppl__figures_and_text.pdf]

Supporting Information for “*Bulk Self-Assembly of Giant, Unilamellar Vesicles*”

James T. Kindt,<sup>†</sup> Jack W. Szostak,<sup>‡,§</sup> and Anna Wang<sup>\*,†,‡,§</sup>

<sup>†</sup>School of Chemistry, Emory University, Atlanta, GA 30322, USA

<sup>‡</sup>Department of Molecular Biology and Center for Computational and Integrative Biology,  
Massachusetts General Hospital, Boston, MA 02114, USA

<sup>¶</sup>School of Chemistry, UNSW Sydney, NSW 2052, Australia

<sup>§</sup>Co-corresponding authors

E-mail: [anna.wang@unsw.edu.au](mailto:anna.wang@unsw.edu.au)

Scale bar represents 10  $\mu\text{m}$  for all images unless otherwise noted.

**Video S1.** Oleic acid could self-assemble into GUVs. A video scrolling through a sample under phase contrast microscopy where 5 mM oleic acid and 5 mM NaOH is dispersed in dilute HCl (final pH 8.3).

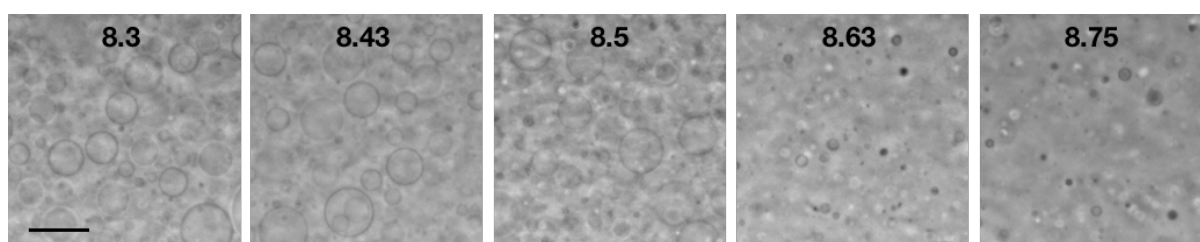

**Figure S2.** The morphology that oleic acid self-assembled into depended on the pH of the buffer (labelled above). 5 mM oleic acid and 50 mM Na-bicine were used.

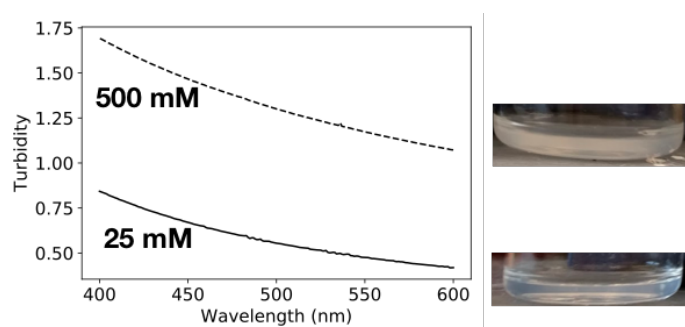

**Figure S3.** GUV samples (for example, vesicles made with 25 mM Na-bicine) looked almost transparent, and their bulk turbidity (measured on a Cary 60 UV-Vis spectrophotometer) was much lower than the turbidity of MLV samples (for example, vesicles made with 500 mM Na-bicine).

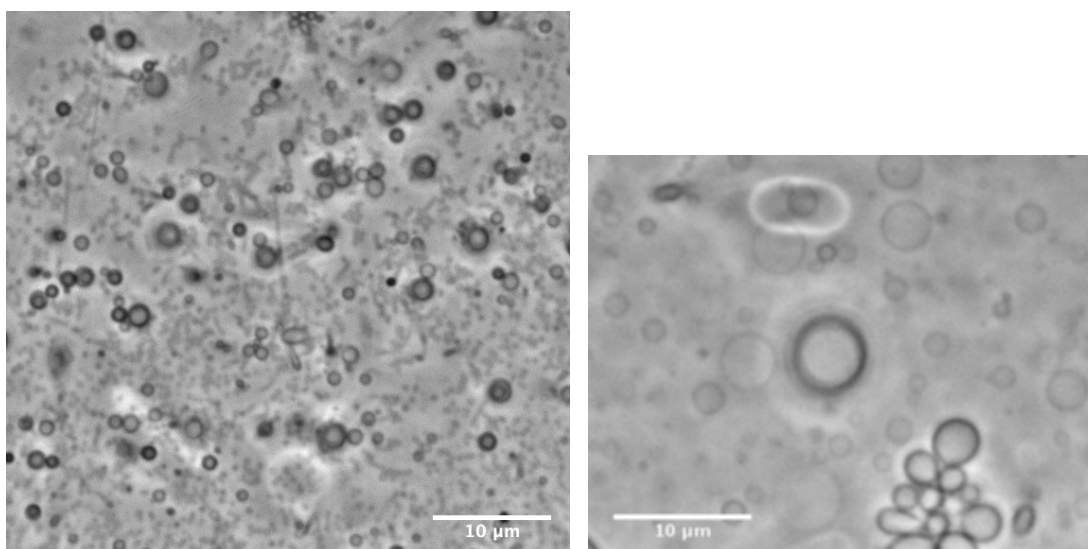

**Figure S4.** Unclean glass can seed the growth of vesicles that are easily distinguished from the self-assembled GUVs. Left: Leaving a 5 mM oleic acid in 25 mM Na-bicine, pH 8.43 solution on a glass coverslip resulted in growth of high-contrast structures. Right: 5 mM pre-assembled oleic acid GUVs in 50 mM Na-bicine, pH 8.43 incubated on an unwashed glass coverslip also resulted in the growth of high-contrast structures on the coverslip. The bulk-assembled GUVs have much lower contrast and appear much more spherical than the structures grown on the glass.

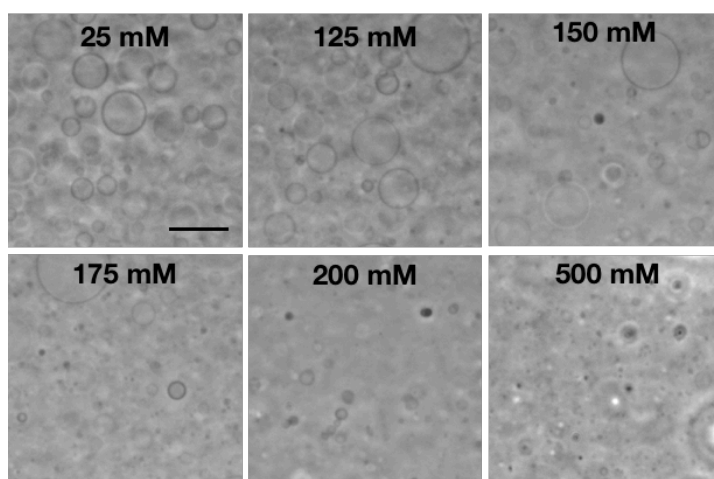

**Figure S5.** The vesicle morphology that 5 mM oleic acid self-assembled into depended on the total Na-bicine concentration (labelled).

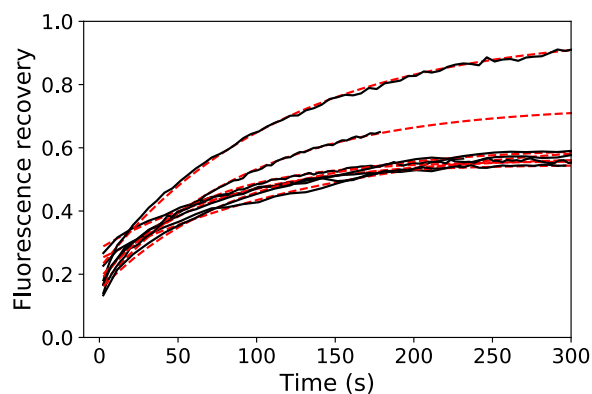

**Table 1. FRAP results**

| Best-fit $D$ | $R^2$ |
|--------------|-------|
| 7.591        | 0.993 |
| 12.315       | 0.980 |
| 11.275       | 0.997 |
| 21.06        | 0.995 |
| 12.507       | 0.998 |
| 20.993       | 0.994 |
| 14.604       | 0.995 |

**Figure S6.** For an oleic-acid supported lipid bilayer, the fluorescence recovery over a 54- $\mu\text{m}$ -diameter bleached region is monitored over time (black). The model from Kang *et al.* (red) is used to fit the data. This model accounts for any fluorescence recovery that occurs during photobleaching. Best-fit  $D$ , and the  $R^2$  statistic for each of the fits is shown in **Table 1**.

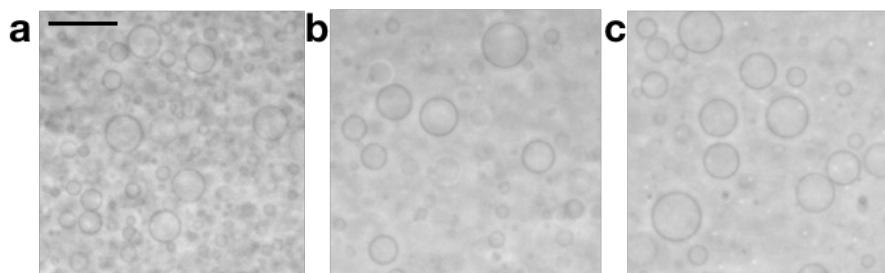

**Figure S7.** Fatty acids with mixed and varied saturation could also self-assemble into GUVs. Phase contrast images are shown. a) 5 mM linolenic acid in 50 mM Na-bicine pH 8.2, b) 3.5 mM oleic acid and 1.5 mM lauric acid in 25 mM Na-bicine, pH 8.43 c) 4 mM oleic acid and 1 mM myristic acid with 5 mM NaOH and 2.5 mM HCl.

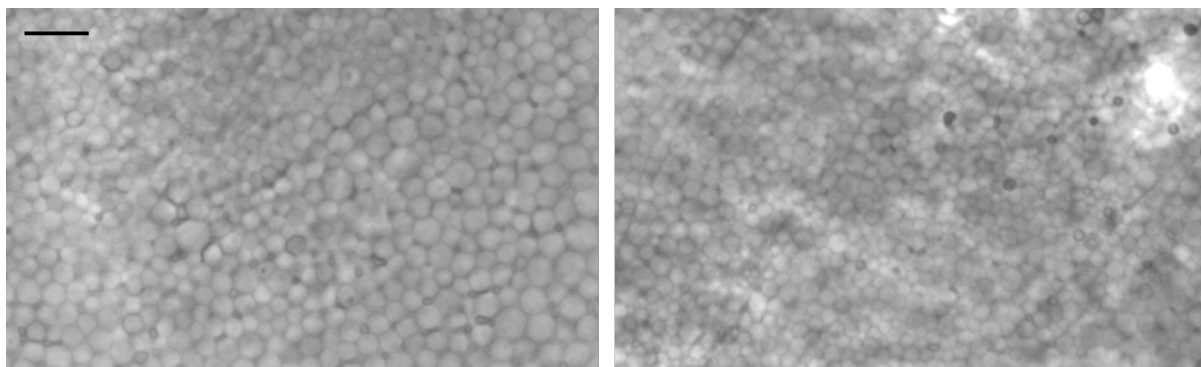

**Figure S8.** Vesicles were jammed in some parts of a sample containing 20mM oleic acid dispersed in 50 mM bicine, pH 8.23.

**Video S9.** Oleic acid could self-assemble into a space-filling, and almost jammed state. Phase contrast video scrolling through a sample of 20mM oleate dispersed in 50 mM Na-bicine, pH 8.23.

**Video S10.** Decanoic acid could self-assemble into a space-filling, and almost jammed state. Video scrolling through a sample of 40mM decanoic acid dispersed in 100 mM PIPES, pH 6.6. The vesicles were space-filling and are almost jammed. There were many spherical vesicles within vesicles.

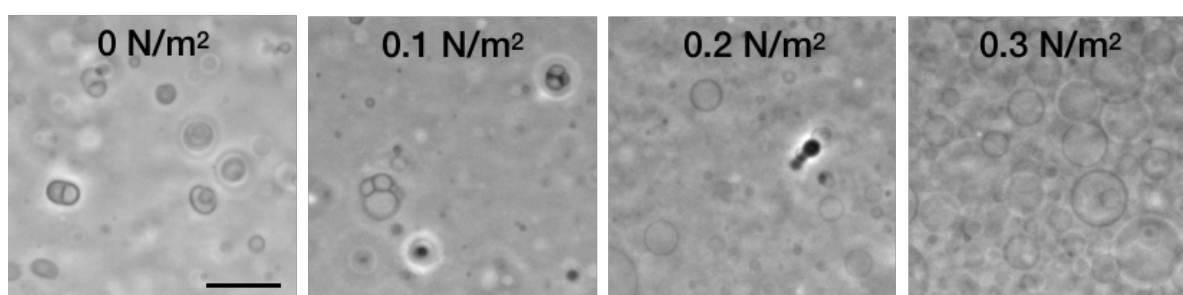

**Figure S11.** Samples containing 5 mM oleic acid in 50 mM Na-bicine, pH 8.43, were left overnight on orbital shakers. They were exposed to different levels of maximum shear (0 rpm = 0 N/m<sup>2</sup>, 40 rpm = 0.1 N/m<sup>2</sup>, 60 rpm = 0.2 N/m<sup>2</sup>, 80 rpm = 0.3 N/m<sup>2</sup>) and self-assembled into different morphologies ranging from quite varied to giant and spherical.

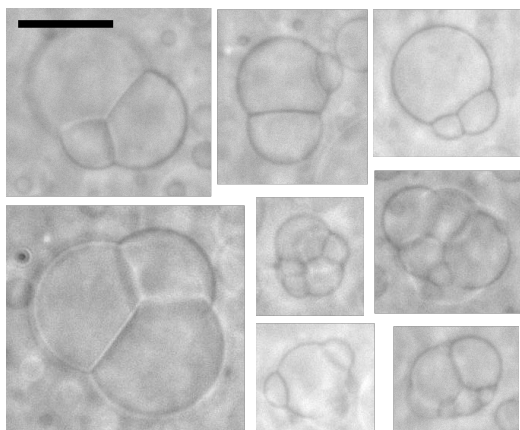

**Figure S12.** Foam-like intermediates of vesicles appeared prior to GUV formation. Sample shown here is 4 mM oleic acid and 1 mM myristic acid, with 5 mM NaOH and 2.5 mM HCl.

**Video S13.** Oleic acid GUVs could encapsulate colloidal particles during self-assembly. Video of trapped 400-nm-diameter colloidal particles in 50mM Na-bicine, pH 8.2, with 500 mM sucrose encapsulated and 500 mM glucose in the equiosmolar dilution buffer.

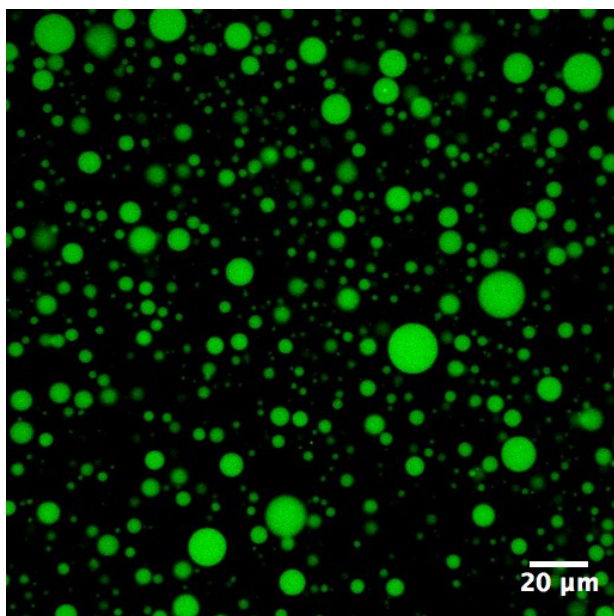

**Figure S14.** Vesicles survived centrifugation against an Amicon Ultrafree-MC filter for 25 minutes at 500 *g*. Confocal micrograph of 5 mM oleic acid vesicles in 50 mM Na-bicine, pH 8.2 containing 0.2 mM HPTS dye, diluted 1 in 10 into buffer without any dye.

**Video S15. and**

**Video S16.** Vesicle solutions appeared unchanged after 2 weeks at room temperature. 5  $\mu\text{L}$  aliquots of a well-mixed 1 mL sample are taken and imaged with phase contrast microscopy at the start (Video S15) and end (Video S16) of a two-week period. The samples are 3.5 mM oleic acid and 1.5 mM lauric acid in 25 mM Na-bicine, pH 8.43.

**Video S17. and**

**Video S18.** Oleic acid GUVs could divide upon a sudden increase in surface area. Video of oleic acid vesicles encapsulating 10  $\mu\text{M}$  of fluorescently tagged RNA in 100 mM Na-bicine pH 8.2 and 200 mM sucrose, diluted into equiosmolar 200 mM glucose buffer. Addition of 5  $\mu\text{L}$  of 100 mM oleic acid micelles into a sample trough containing 165  $\mu\text{L}$  of vesicle solution, near the imaging site, resulted in GUV division.

**Video S19.** Oleic acid GUVs could pearl upon an increase in surface area. Video of vesicles encapsulating 10  $\mu\text{M}$  of fluorescently tagged RNA in 100 mM Na-bicine pH 8.2 and 200 mM sucrose, diluted into equiosmolar 200 mM glucose buffer. Addition of 5  $\mu\text{L}$  of 100 mM oleic acid micelles into a sample trough containing 165  $\mu\text{L}$  of vesicle solution while mixing well resulted in GUV pearling without fission.
